# Supplementary material for: Development of an In Vitro Model of SARS-CoV-Induced Acute Lung Injury for Studying New Therapeutic Approaches
Source: MDPI journal article supplement (doi:10.3390/antiox11101910), 2022-09-27

**bFGF**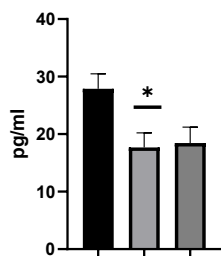**Eotaxin**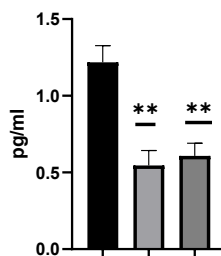**G-CSF**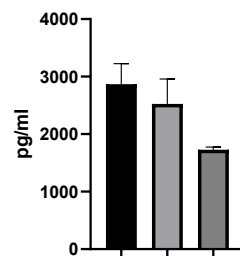**GRO-a**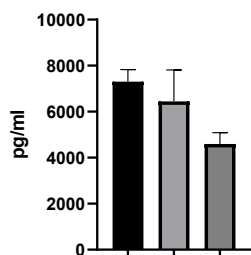**HGF**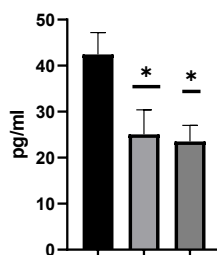**IFN-α2**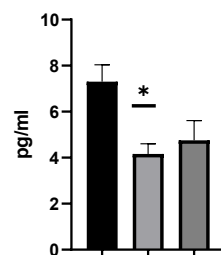**IL-1α**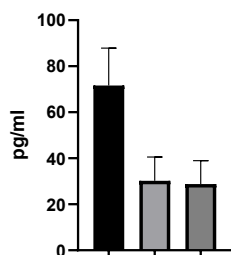**IL-1β**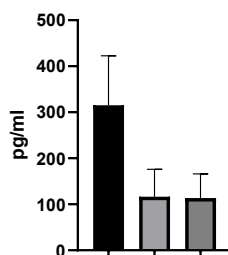**IL-1ra**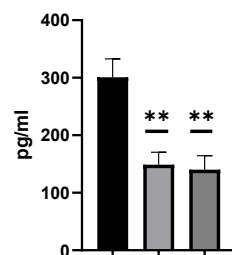**IL-3**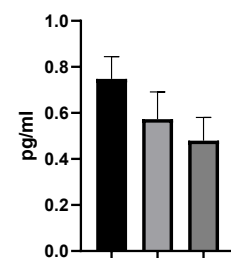**IL-7**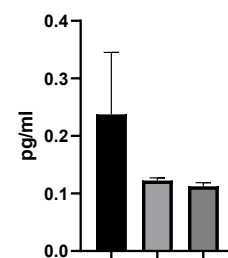**IL-8**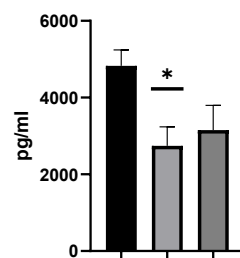

A549+PBMC+LPS  
A549+PBMC+LPS+DEX  
A549+PBMC+LPS + (DEX 1 h)

A549+PBMC+LPS  
A549+PBMC+LPS+DEX  
A549+PBMC+LPS + (DEX 1 h)

A549+PBMC+LPS  
A549+PBMC+LPS+DEX  
A549+PBMC+LPS + (DEX 1 h)

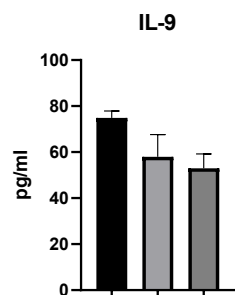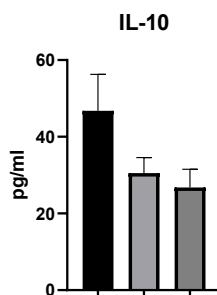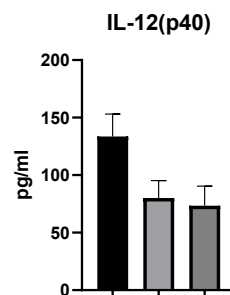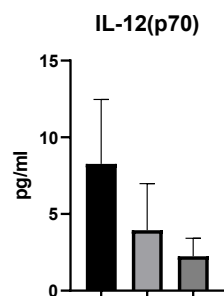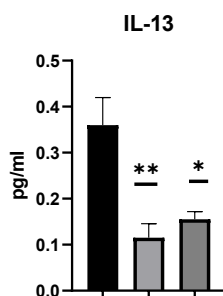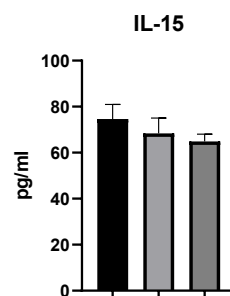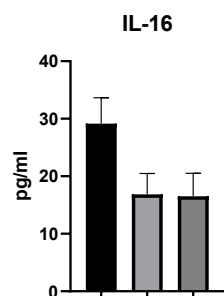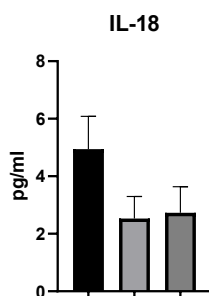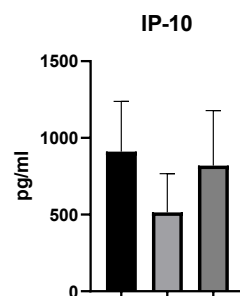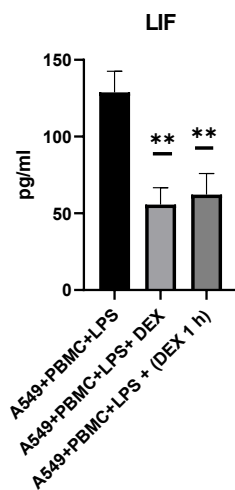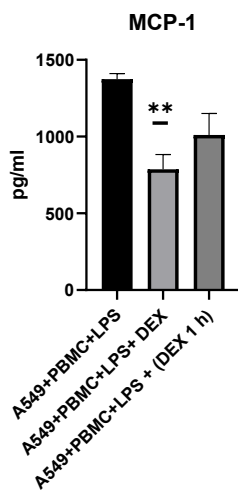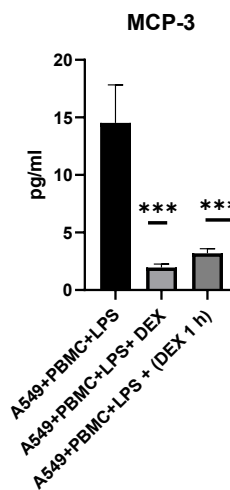

**M-CSF**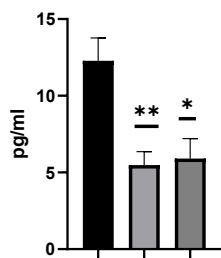**MIF**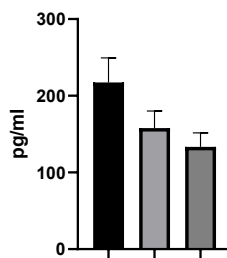**MIP-1a**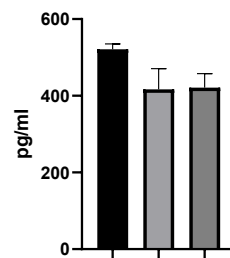**MIP-1b**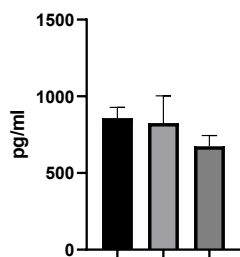**b-NGF**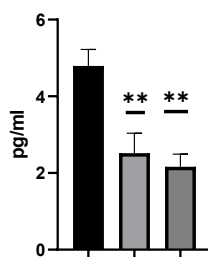**PDGF-BB**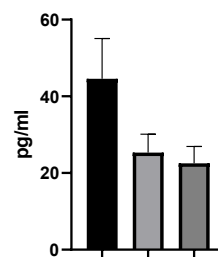**RANTES**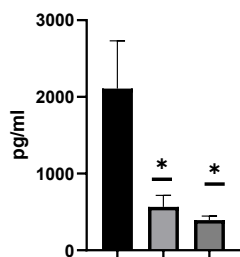**SCF**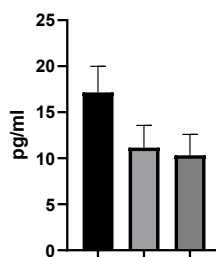**SCGF-b**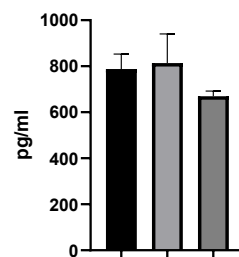**SDF-1a**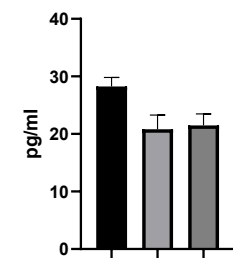**TRAIL**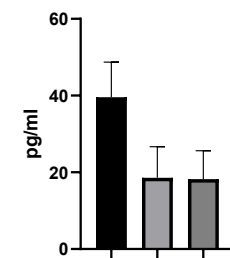**VEGF-A**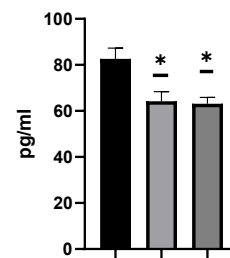

Supplement: s1 [file s1]
