# Supplementary material for: Development of an In Vitro Model of SARS-CoV-Induced Acute Lung Injury for Studying New Therapeutic Approaches
Source: MDPI journal article supplement (doi:10.3390/antiox11101910), 2022-09-27

**bFGF**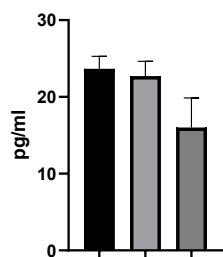**Eotaxin**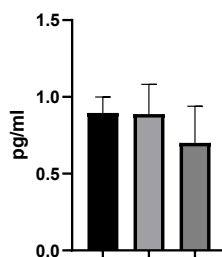**G-CSF**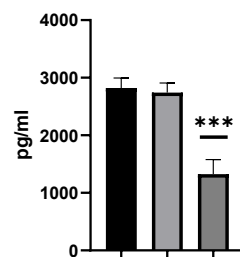**GRO-a**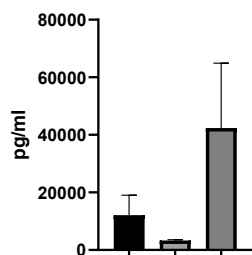**HGF**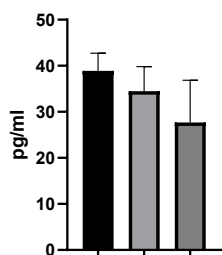**IFN- $\alpha$ 2**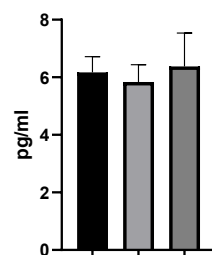**IL-1 $\alpha$** 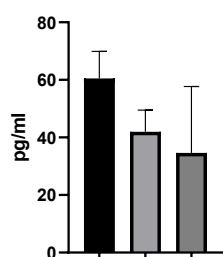**IL-1 $\beta$** 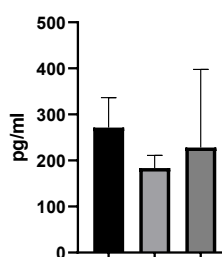**IL-1 $\alpha$** 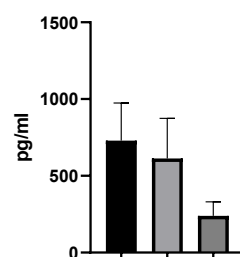**IL-3**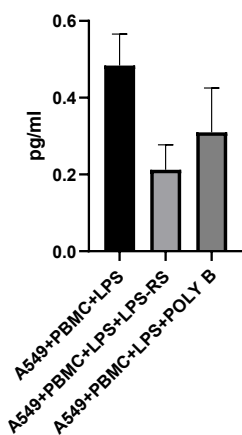**IL-7**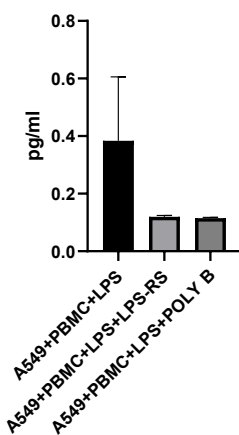**IL-8**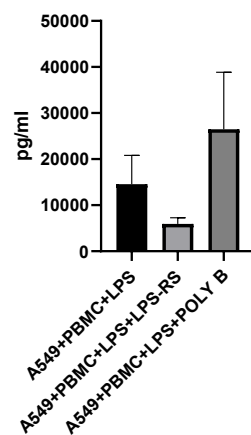

IL-9

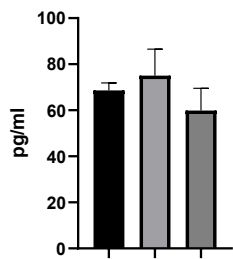

IL-10

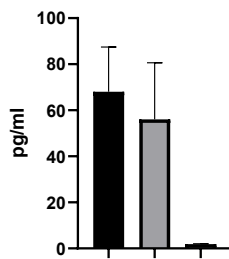

IL-12(p40)

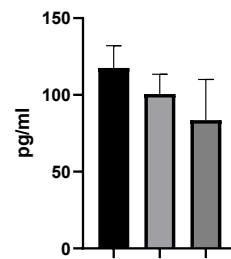

IL-12(p70)

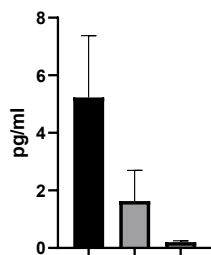

IL-13

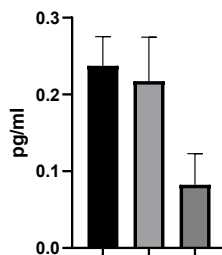

IL-15

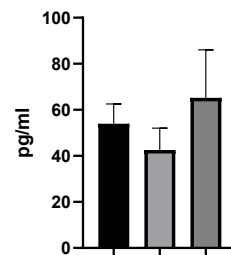

IL-16

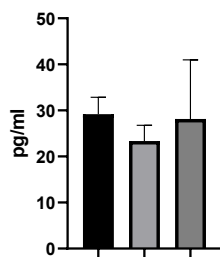

IL-18

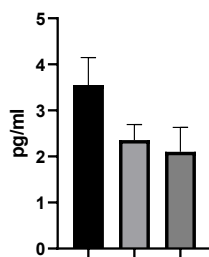

IP-10

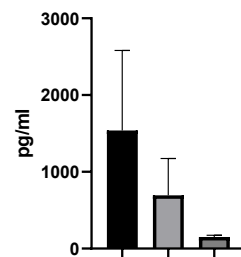

LIF

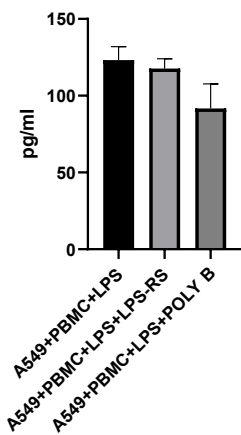

MCP-1

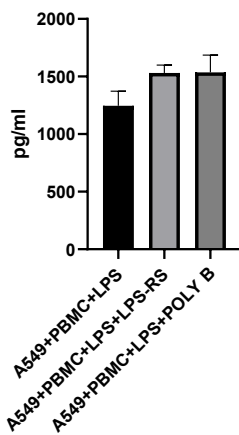

MCP-3

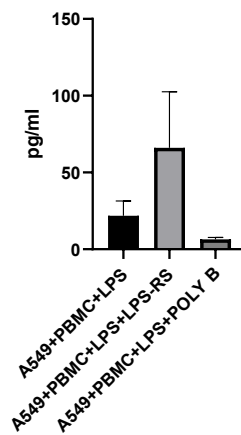

**M-CSF**

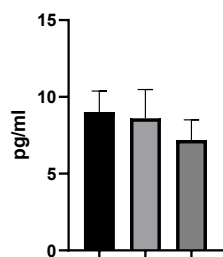

**MIF**

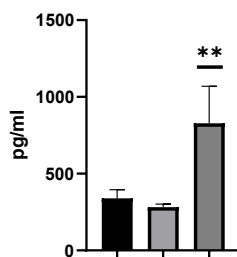

**MIP-1a**

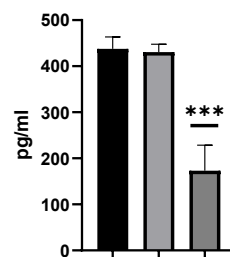

**MIP-1b**

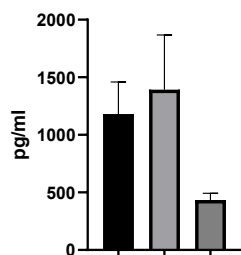

**b-NGF**

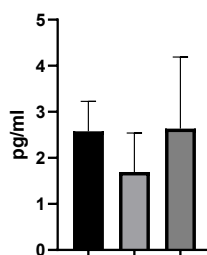

**PDGF-BB**

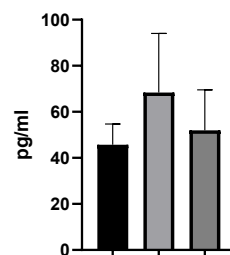

**RANTES**

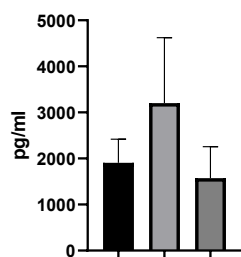

**SCF**

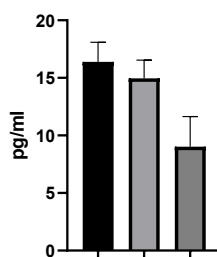

**SCGF-b**

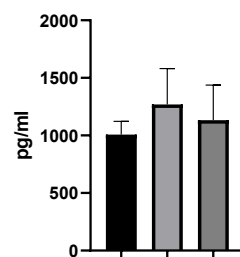

**SDF-1a**

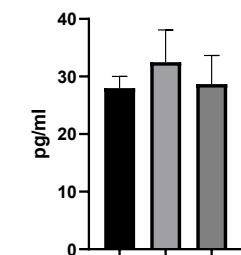

**TRAIL**

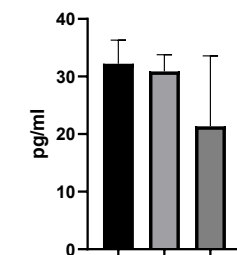

**VEGF-A**

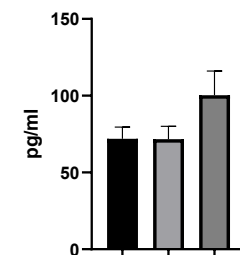

Supplement: s1 [file s1]
