# Supplementary material for: Development of an In Vitro Model of SARS-CoV-Induced Acute Lung Injury for Studying New Therapeutic Approaches
Source: MDPI journal article supplement (doi:10.3390/antiox11101910), 2022-09-27

**bFGF**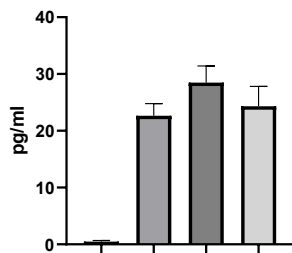**Eotaxin**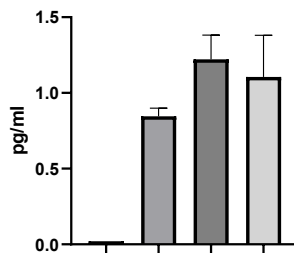**GM-CSF**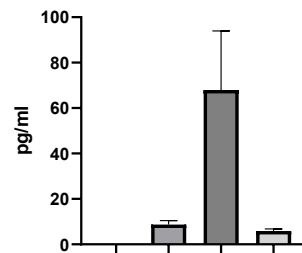**GRO-a**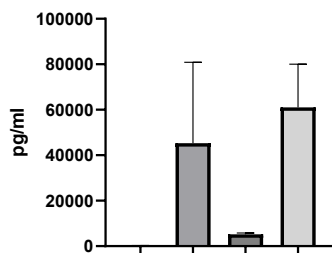**IFN-a2**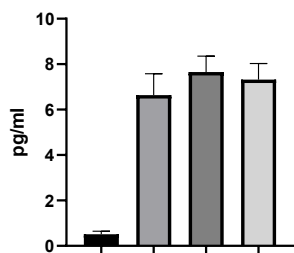**IFN-g**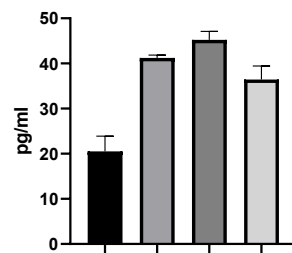**IL-1a**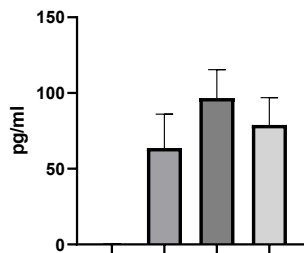**IL-1b**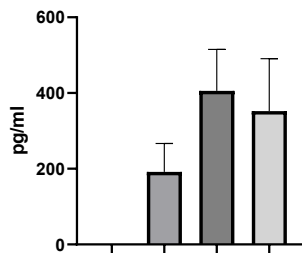**IL-1ra**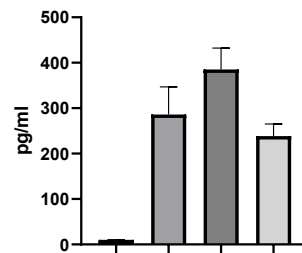**IL-2**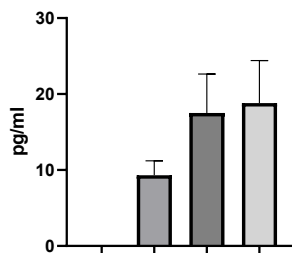**IL-2Ra**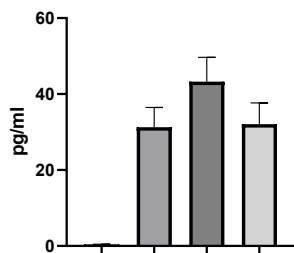**IL-3**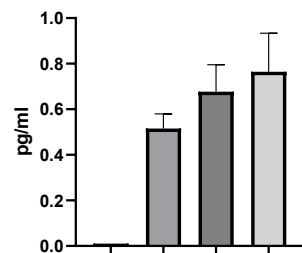

IL-4

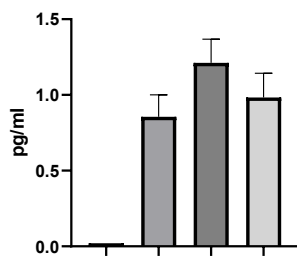

IL-7

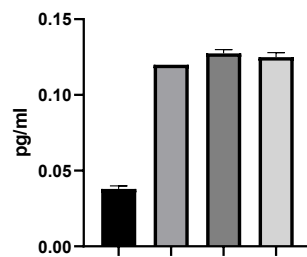

IL-9

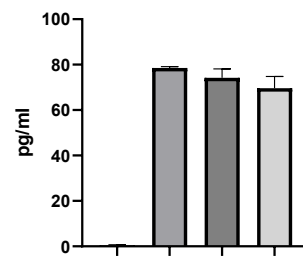

IL-10

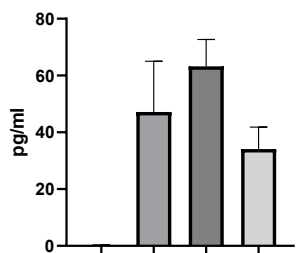

IL-12(p40)

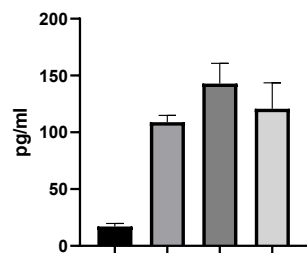

IL-12(p70)

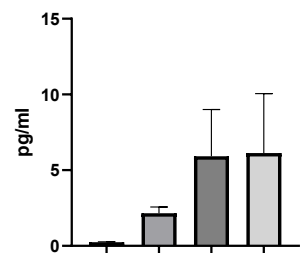

IL-13

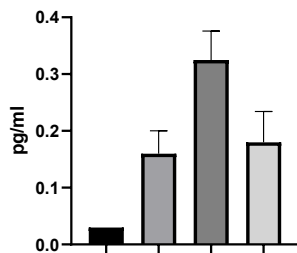

IL-15

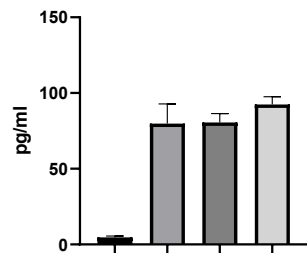

IL-16

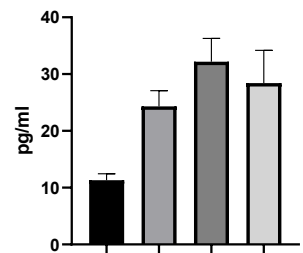

IL-17A

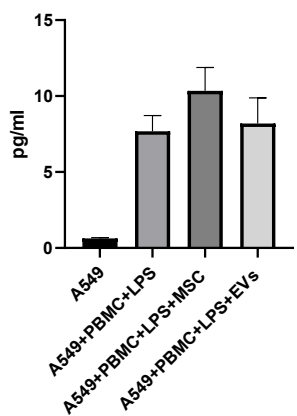

IL-18

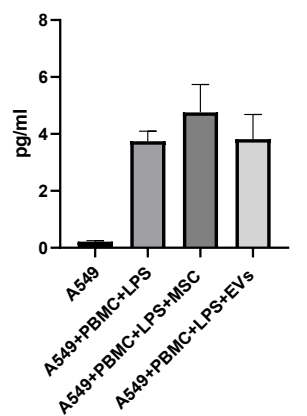

IL-18

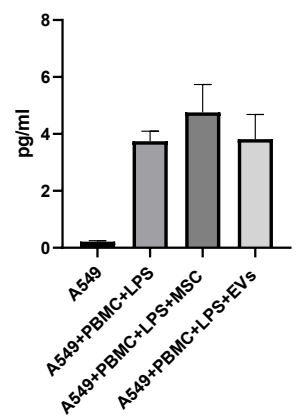

**IP-10**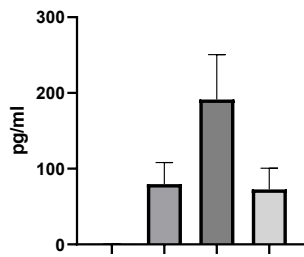**LIF**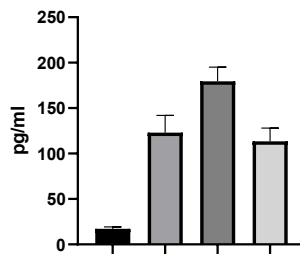**MCP-1**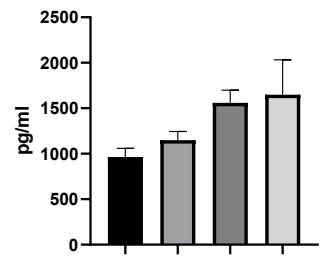**M-CSF**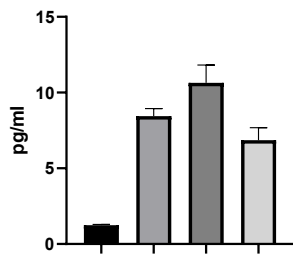**MIF**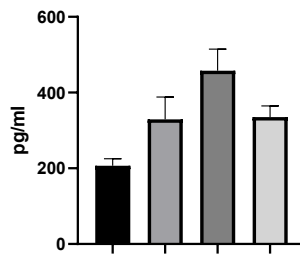**MIG**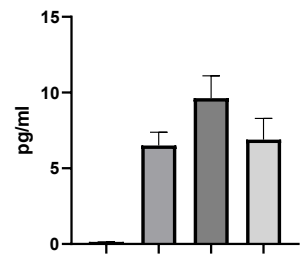**MIP-1a**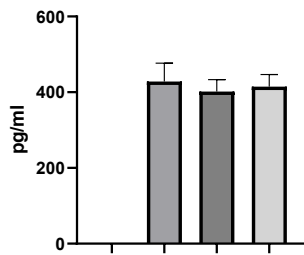**MIP-1b**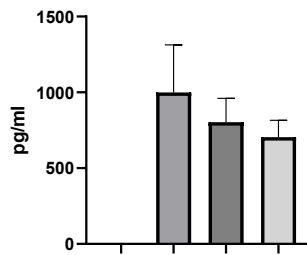**b-NGF**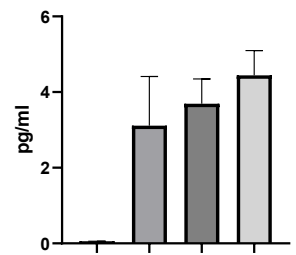**PDGF-BB**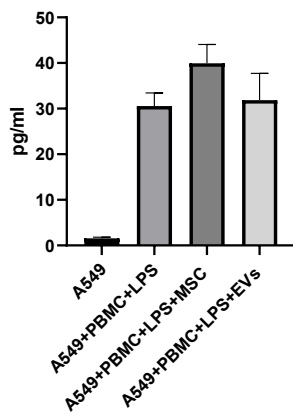**RANTES**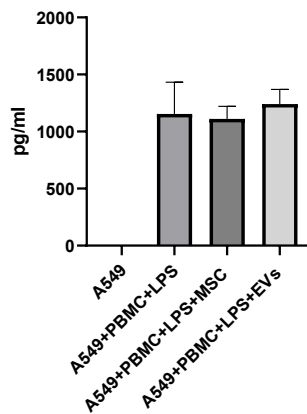**SCF**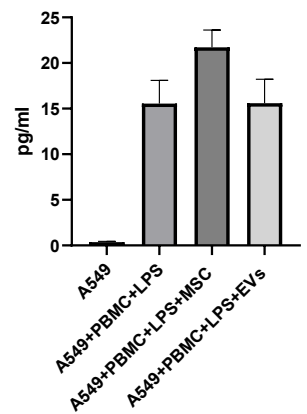

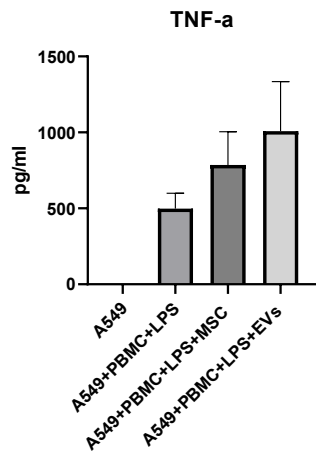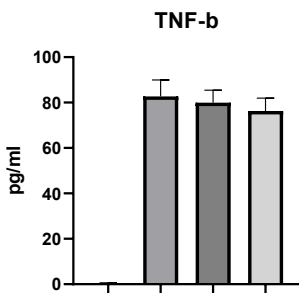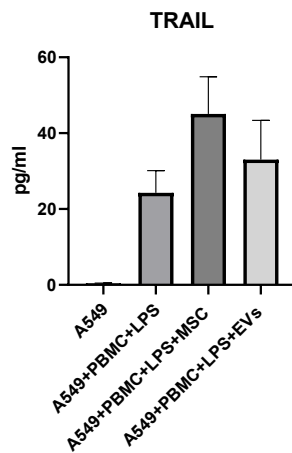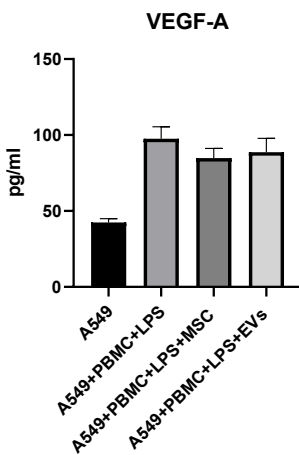

Supplement: s1 [file s1]
